# Supplementary material
Source: HighWire-hosted journal article supplement (https://bmjopen.bmj.com/content/9/6/e023450)
Supplement: inline-supplementary-material-2 [file inline-supplementary-material-2.pdf]

Table S2 Characteristics of young patients with untreated intermittent adult-onset asthma who were categorised by the duration of smoking

|                                         | Duration of smoking, (years) |                                    |                       | p-value           |
|-----------------------------------------|------------------------------|------------------------------------|-----------------------|-------------------|
|                                         | Never<br>(n = 156)           | 1–7 <sup>†</sup> years<br>(n = 49) | ≥ 8 years<br>(n = 57) |                   |
| Age, (years)                            | 26.9 ± 4.7                   | 25.8 ± 3.5                         | 29.7 ± 2.3            | <b>&lt; 0.001</b> |
| Age at onset, (years)                   | 24.9 ± 5.0                   | 23.2 ± 4.1                         | 27.1 ± 4.0            | <b>&lt; 0.001</b> |
| Men, n (%)                              | 35 (22.4)                    | 18 (36.7)                          | 21 (36.8)             | <b>0.040</b>      |
| Duration of asthma,<br>(months)         | 10 (2–36)                    | 12 (2–48)                          | 12 (2–42)             | 0.575             |
| BMI, kg·m <sup>-2</sup>                 | 21.6 ± 3.4                   | 22.7 ± 4.71                        | 21.7 ± 3.2            | 0.159             |
| Total IgE, (IU/mL)                      | 164 (70–537)                 | 217 (63–983)                       | 248 (62–655)          | 0.274             |
| Peripheral blood<br>eosinophil, (count) | 230 (105–405)                | 290 (155–535)                      | 350 (240–640)         | <b>0.006</b>      |
| Atopy, n (%)                            | 138 (89)                     | 43 (88)                            | 54 (95)               | 0.364             |
| Pre-bronchodilator lung function        |                              |                                    |                       |                   |
| FEV <sub>1</sub> (% predicted)          | 96.4 ± 12.6                  | 91.8 ± 12.1                        | 88.9 ± 13.7           | <b>&lt; 0.001</b> |
| FEV <sub>1</sub> /FVC ratio             | 0.85 ± 0.07                  | 0.83 ± 0.09                        | 0.80 ± 0.07           | <b>&lt; 0.001</b> |
| FVC (L)                                 | 3.50 ± 0.70                  | 3.75 ± 0.94                        | 3.56 ± 0.83           | 0.248             |
| FVC (%)                                 | 107 ± 12.7                   | 106 ± 14.2                         | 103 ± 18.1            | 0.208             |
| FEF <sub>25–75</sub> (% predicted)      | 76.3 ± 22.4                  | 68.7 ± 19.7                        | 62.6 ± 20.7           | <b>&lt; 0.001</b> |
| Post-bronchodilator lung function       |                              |                                    |                       |                   |
| FEV <sub>1</sub> (% predicted)          | 101 ± 14.7                   | 98.4 ± 14.0                        | 91.3 ± 19.5           | <b>0.002</b>      |
| FEV <sub>1</sub> /FVC ratio             | 0.89 ± 0.07                  | 0.87 ± 0.10                        | 0.83 ± 0.08           | <b>0.001</b>      |
| FEF <sub>25–75</sub> (% predicted)      | 89.2 ± 21.3                  | 82.7 ± 21.7                        | 74.4 ± 23.8           | <b>&lt; 0.001</b> |
| ΔFEV <sub>1</sub> (%)‡                  | 4.89 ± 12.6                  | 7.09 ± 7.19                        | 8.16 ± 6.39           | 0.136             |
| HisPC20 (mg/mL)                         | 2.52<br>(1.05–4.49)          | 1.63<br>(0.41–3.44)                | 1.36<br>(0.56–2.61)   | <b>0.002</b>      |

Data are presented as means ± standard deviations, n (%), or medians (interquartile ranges).

Post-bronchodilator FVC is missing value, therefore, the data is not shown.

<sup>†</sup>Current smokers were stratified on the basis of the median value for each smoking parameter.

<sup>‡</sup> (Post-bronchodilator FEV<sub>1</sub>–pre-bronchodilator FEV<sub>1</sub>)/pre-bronchodilator FEV<sub>1</sub> (L) ×100

BMI, body mass index; FEV<sub>1</sub>, forced expiratory volume in one second; FVC, forced vital capacity; FEF<sub>25–75</sub>, forced expiratory flow between 25% and 75% of the vital capacity; HisPC20, provocative concentration of histamine leading to a decrease in the forced expiratory volume in 1 second by > 20%
